# Supplementary material for: The Protein Phosphatase 7 Regulates Phytochrome Signaling in Arabidopsis
Source: PubMed Central journal article supplement (PMC2444027; doi:10.1371/journal.pone.0002699), 2008-07-16
Supplement: pone.0002699.s001.pdf [file pone.0002699.s001.pdf]

**Supporting Table S1.** Complementation of the phenotypic hypersensitivity of the *cab2:Ω:luciferase* reporter gene induction by a WT genomic sequence of *AtPP7*.

Luciferase activity in dark-grown seedlings was monitored 20 h after a pulse of light by luminescence video imaging.

| Pulse and Fluence ( $\mu\text{mol}/\text{m}^2$ ) | WT ( <i>cab2:Ω:luc</i> )            | <i>psi2-1</i> ( <i>cab2:Ω:luc</i> ) | <i>psi2-1</i> ( <i>cab2:Ω:luc</i> ) +genomic <i>AtPP7</i> |
|--------------------------------------------------|-------------------------------------|-------------------------------------|-----------------------------------------------------------|
| Dark                                             | 7.3 <sup>a</sup> (3.9) <sup>b</sup> | 9.8 (4.6)                           | 8.5 (5.5)                                                 |
| Red light: 0.2                                   | 30.3 (5.6)                          | 157.6 (12.4)                        | 28.5 (4.8)                                                |
| Red light: 1.0                                   | 43.1 (4.7)                          | 225.9 (21.2)                        | 47.3 (5.9)                                                |
| Far-red light: 1.0                               | 15.4 (3.2)                          | 30.4 (5.5)                          | 17.8 (3.4)                                                |
| Far-red light: 13                                | 21.3 (4.1)                          | 72.5 (6.4)                          | 20.4 (3.9)                                                |

(<sup>a</sup>)Counts per seedling/ 15 min. (<sup>b</sup>)Standard deviation.
