# Supplementary material for: The Protein Phosphatase 7 Regulates Phytochrome Signaling in Arabidopsis
Source: PubMed Central journal article supplement (PMC2444027; doi:10.1371/journal.pone.0002699), 2008-07-16
Supplement: pone.0002699.s002.pdf [file pone.0002699.s002.pdf]

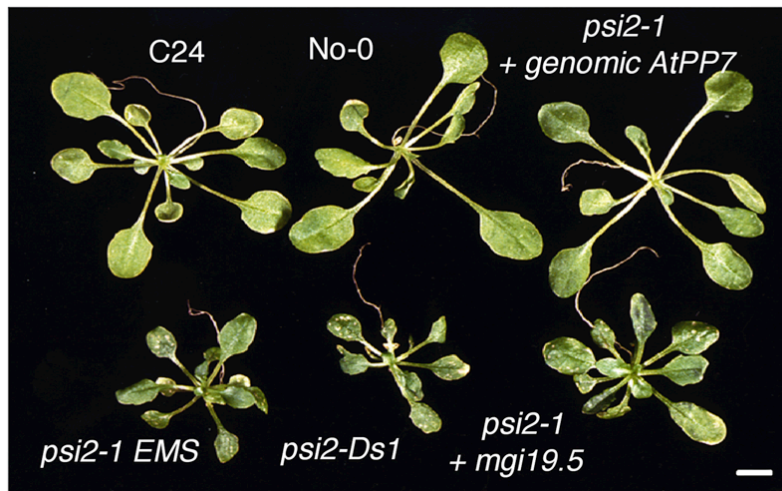

### Supporting Figure S1

Morphology of WT plants, *psi2* mutants, transformed *psi2* mutant plant containing a WT genomic sequence of *AtPP7*, and a *psi2* mutant transformed with the control gene *MGI19.5*. Bar: 5 mm.
