# Supplementary material for: The Protein Phosphatase 7 Regulates Phytochrome Signaling in Arabidopsis
Source: PubMed Central journal article supplement (PMC2444027; doi:10.1371/journal.pone.0002699), 2008-07-16
Supplement: pone.0002699.s003.pdf [file pone.0002699.s003.pdf]

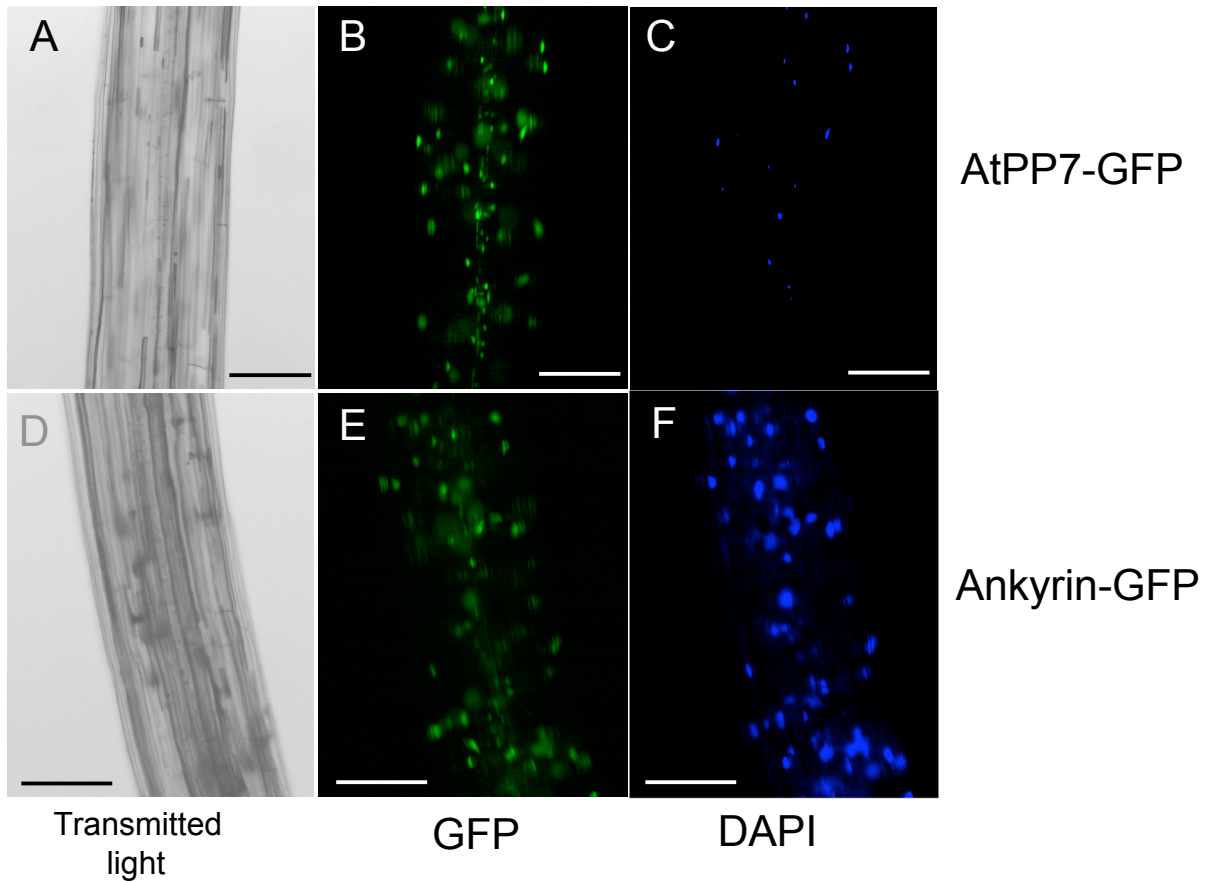

### Supporting Figure S2

Localization of AtPP7-GFP fusion protein expressed in hypocotyl of transformed *psi2-DS1* mutant (A, B, C) and of nuclear ankyrin-GFP fusion protein in control plants (D, E, F) by fluorescence microscopy (B, C, E, F). Seedlings were grown 4 days in darkness and prepared for microscopy under low green light. (C-F) DAPI staining show the position of nuclei. Bar: 200  $\mu$ m.
