# Supplementary material for: The Protein Phosphatase 7 Regulates Phytochrome Signaling in Arabidopsis
Source: PubMed Central journal article supplement (PMC2444027; doi:10.1371/journal.pone.0002699), 2008-07-16
Supplement: pone.0002699.s004.pdf [file pone.0002699.s004.pdf]

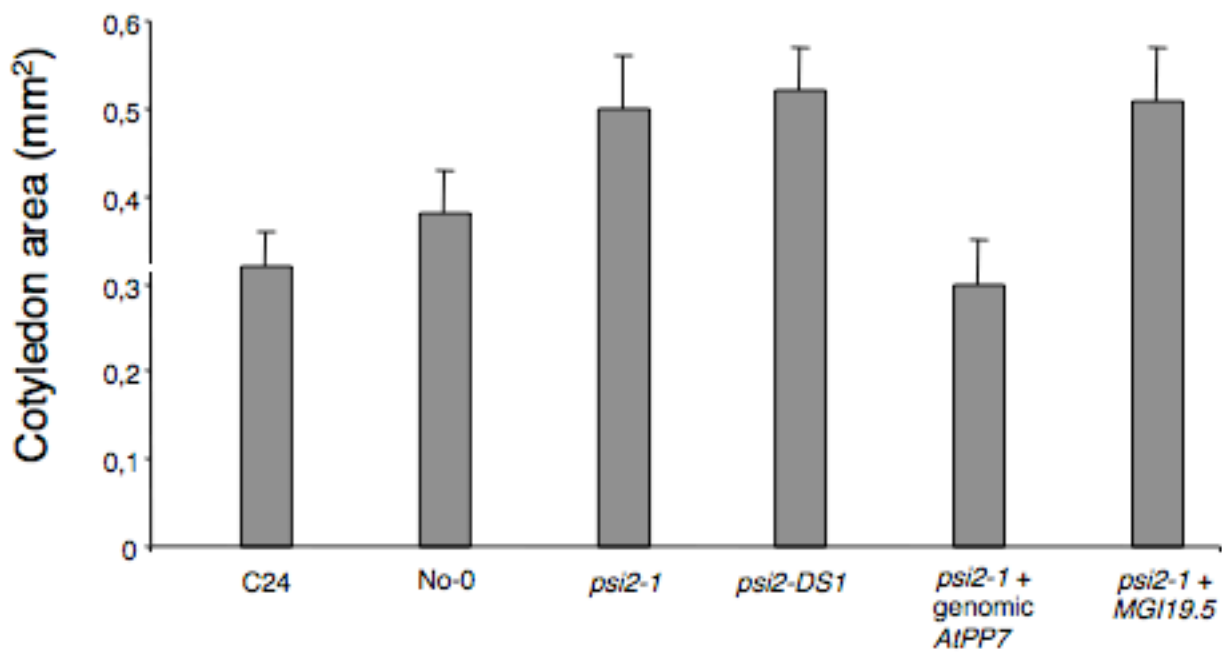

### Supporting Figure S3

Cotyledon enlargement phenotype of *psi2* mutant is complemented with genomic *AtPP7*. Cotyledon surface of dark-grown seedlings were irradiated with  $3 \mu\text{mol m}^{-2} \text{s}^{-1}$  continuous red light during 48 h.
