# Supplementary material for: The Protein Phosphatase 7 Regulates Phytochrome Signaling in Arabidopsis
Source: PubMed Central journal article supplement (PMC2444027; doi:10.1371/journal.pone.0002699), 2008-07-16
Supplement: pone.0002699.s005.pdf [file pone.0002699.s005.pdf]

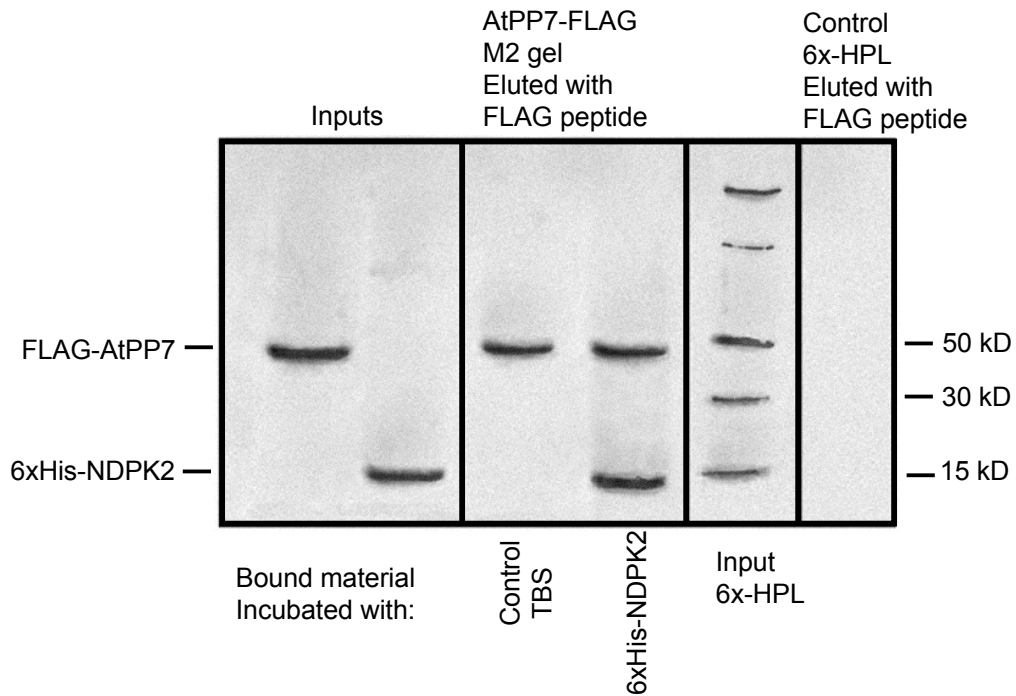

### Supporting Figure S4

The complete AtPP7 protein (FLAG-tagged) interacts with a complete NDPK2 (6xHis-tagged) protein *in vitro*.

Recombinant proteins production and *in vitro* binding assays were conducted as described in Supporting Text S1: Material and Methods.
