# Supplementary material for: The Protein Phosphatase 7 Regulates Phytochrome Signaling in Arabidopsis
Source: PubMed Central journal article supplement (PMC2444027; doi:10.1371/journal.pone.0002699), 2008-07-16
Supplement: pone.0002699.s006.pdf [file pone.0002699.s006.pdf]

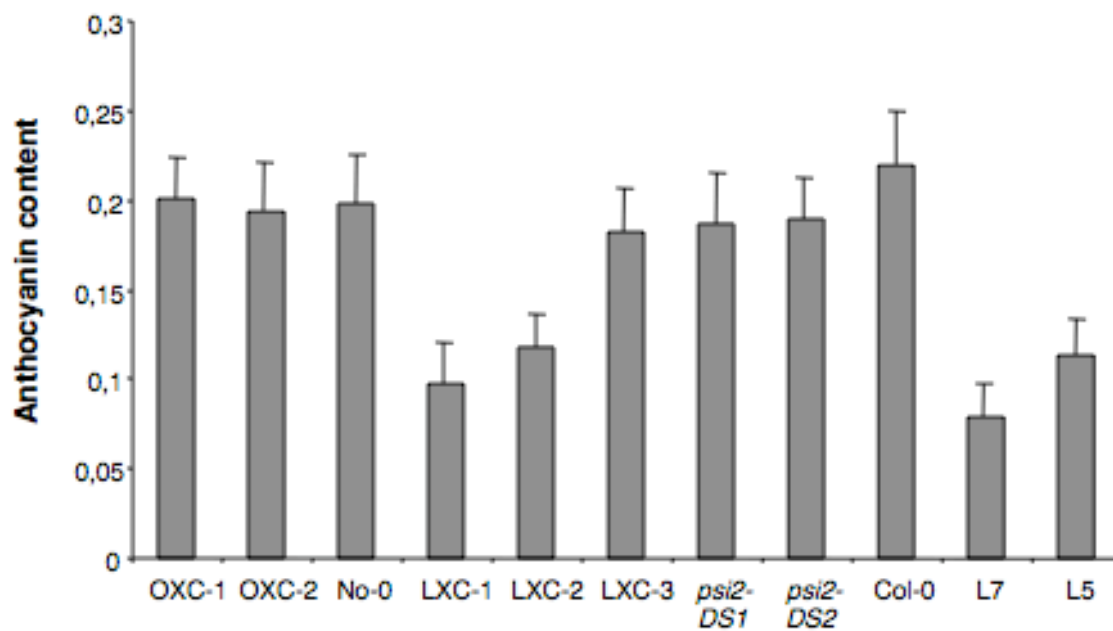

### Supporting Figure S5

Anthocyanin content in blue light treated seedlings expressing various level of *AtPP7*. Seedlings of the genotype as before described were grown in continous blue light ( $25 \mu\text{mol m}^{-2} \text{s}^{-1}$ ) for 4 days.
